# Supplementary material for: Ni5Fe5/Al2O3 catalytic hydrogenolysis of lignin: mechanism investigation and selectivity regulation
Source: Royal Society of Chemistry journal article supplement (doi:10.1039/d3gc01988h), 2023-01-01
Supplement: d3gc01988h1.pdf [file d3gc01988h1.pdf]

Supporting Information for

**Ni<sub>5</sub>Fe<sub>5</sub>/Al<sub>2</sub>O<sub>3</sub> catalytic hydrogenolysis of lignin:  
mechanism investigation and selectivity regulation**

Zhensheng Shen<sup>a,b</sup>, Wei Wang<sup>a,b</sup>, Lun Pan<sup>a,b,c</sup>, Zhenfeng Huang<sup>a,b</sup>, Xiangwen Zhang<sup>a,b,c</sup>,  
Chengxiang Shi<sup>a,b,\*</sup> and Ji-Jun Zou<sup>a,b,c,\*</sup>

<sup>a</sup> Key Laboratory for Green Chemical Technology of Ministry of Education, School of  
Chemical Engineering and Technology, Tianjin University, Tianjin 300072, China

<sup>b</sup> Collaborative Innovative Center of Chemical Science and Engineering (Tianjin),  
Tianjin 300072, China

<sup>c</sup> Haihe Laboratory of Sustainable Chemical Transformations, Tianjin 300192, China

\* Corresponding author.

*E-mail address: cxshi@tju.edu.cn, jj\_zou@tju.edu.cn*

This supporting document includes:

Number of Tables: 1

Number of Figures: 11

Total pages: 14

## Experimental

### Catalyst Preparation

$\text{Ni}_5\text{Fe}_5/\text{Al}_2\text{O}_3$  ( $\text{Nb}_2\text{O}_5$ ,  $\text{TiO}_2$ ,  $\text{ZrO}_2$ ) were prepared by the incipient wetness method. 0.2476g  $\text{Ni}(\text{NO}_3)_2 \cdot 6\text{H}_2\text{O}$ , 0.3617g  $\text{Fe}(\text{NO}_3)_3 \cdot 9\text{H}_2\text{O}$  are dissolved in a certain volume of deionized water to form a uniform solution and then slowly added to 1g of oxide carrier. After aging at room temperature for 12h, maintain at  $60^\circ\text{C}$  for 12h to remove excess water. Then the prepared catalysts were calcined at  $500^\circ\text{C}$  for 3 h and reduced by 10%  $\text{H}_2/90\%$  Ar at  $400^\circ\text{C}$  for 3 h in a tubular furnace. The synthesis of  $\text{Ni}_{10-x}\text{Fe}_x/\text{Al}_2\text{O}_3$  is the same as the above method, except that the feeding ratio of Ni and Fe precursors is different.

### Catalyst characterization

The X-ray powder diffraction pattern was recorded by an X-ray diffractometer (XPERTPRO, PANalytical B.V.), Cu target  $\text{K}\alpha$  X-ray,  $\lambda = 0.154$  nm, operated at 40 kV, 200 mA, measuring range  $2\theta = 5^\circ \sim 80^\circ$ , the step length is  $0.02^\circ$ , and the scanning speed is  $5^\circ/\text{min}$ . The scanning electron microscope images (SEM) were recorded by field emission scanning electron microscope (Apero S LoVac, FEI). The transmission electron microscope (TEM) and high-resolution image (HRTEM) of the catalyst were obtained using the JEM-F200 field emission electron microscope operating at 200 kV. The instrument is equipped with STEM dark field detector. The specific surface area of samples was determined by the American Micromeritics ASAP 2020 nitrogen physical adsorption/desorption analyzer. Before the experiment, 0.1 g of the sample was degassed at  $300^\circ\text{C}$  and  $10^{-4}$  Pa for more than 8 h, and the liquid nitrogen temperature was  $-196^\circ\text{C}$ ; The specific surface area of the catalyst was calculated by Brunauer-Emmett-Telle (BET) method.  $\text{NH}_3$  temperature programmed desorption ( $\text{NH}_3$ -TPD) was determined on the chemisorption instrument. Put 50 mg of the dried catalyst in the sample test tube, purge it for 2 h in an inert atmosphere of  $300^\circ\text{C}$ , and cool it to  $50^\circ\text{C}$ . In an  $\text{NH}_3/\text{Ar}$  atmosphere, adsorb it for 2 h to saturation, and then purge it for 1 h in an Ar atmosphere of 50 mL/min, and then raise the temperature from  $50^\circ\text{C}$  left to right at a heating rate of  $10^\circ\text{C}/\text{min}$  to  $700^\circ\text{C}$  in an Ar atmosphere of 50 mL/min. The  $\text{H}_2$  temperature programmed reduction ( $\text{H}_2$ -TPR) curve was determined by an automatic chemisorption instrument (AutoChem II 2920, American Mike Instrument). Purge 100 mg of sample in Ar (30 mL/min) at  $300^\circ\text{C}$  for 30 minutes, and then cool to room temperature. Use the reducing gas containing 5%  $\text{H}_2/95\%$  Ar, the flow rate is 30 mL/min, the heating rate is  $10^\circ\text{C}/\text{min}$ , and the room temperature rises to  $700^\circ\text{C}$ . Use

the TCD detector to monitor the consumption of H<sub>2</sub>. X-ray photoelectron spectroscopy (XPS) is recorded by an X-ray photoelectron spectroscopy analyzer (K-Alpha+, Thermo).

### Catalyst activity tests

The reduction catalytic fractionation of beech sawdust and the conversion of model compounds were carried out in a 100 ml Hastelloy high-pressure reactor. For each reaction, add 1 g of wood powder, 0-0.2 g of catalyst, and 20 ml of methanol to the reactor, and then replace the gas in the reactor with pure N<sub>2</sub> and pure H<sub>2</sub> three times respectively, and pressurize with H<sub>2</sub> to the target pressure (0-4 Mpa). After that, raise the temperature to the target temperature (190-270°C) at 5°C/min and maintain a certain reaction time (1-5 h). After the reaction, immediately cool the reactor to room temperature with ice water. After the reactor is opened, the solid-liquid mixture is separated by suction filtration, and weigh the solid product (solid residue after reaction and catalyst) after drying overnight at 100°C; After the solvent is removed by the rotary evaporator, the liquid product is extracted with dichloromethane and water for three times, and the dichloromethane phase (lignin oil) is dried overnight at 45°C and then weighed. GC and HPLC analyses (Figure S1) of the pre-extraction, post-extraction and aqueous phase products showed that cellulose hemicellulose derivatives were extracted into the aqueous phase and that the quantification of lignin oil was accurate. Using n-decane as the internal standard, the product was quantified by gas chromatography (GC, Shimadzu 2010 plus), equipped with a hydrogen flame ionization detector (FID) and HP-5 capillary column (30 m × 0.32 mm × 0.25 μm). The heating process is 40°C for 1 minute, then increase to 150°C at the rate of 10°C/min for 2 minutes, and then increases to 300°C at the rate of 20°C/min for 10 minutes. The product was identified by a GC-MS combination (GC-MS, Shimadzu QP 2010S). The yield and selectivity of the product are calculated by the following formula:

$$\text{Phenolic monomers yield} = \frac{\text{Mass (total monomers)}}{\text{Mass (lignin)}} * 100\% \quad (1)$$

$$\text{X monomer selectivity} = \frac{\text{Mass (X monomer selectivity)}}{\text{Mass (total monomers)}} * 100\% \quad (2)$$

$$\text{Lignin oil yield} = \frac{\text{Mass (Lignin oil)}}{\text{Mass (lignin)}} * 100\% \quad (3)$$

$$\text{Solid residue yield} = \frac{\text{Mass(solid residue)}}{\text{Mass (beech sawdust)}} * 100\% \quad (4)$$

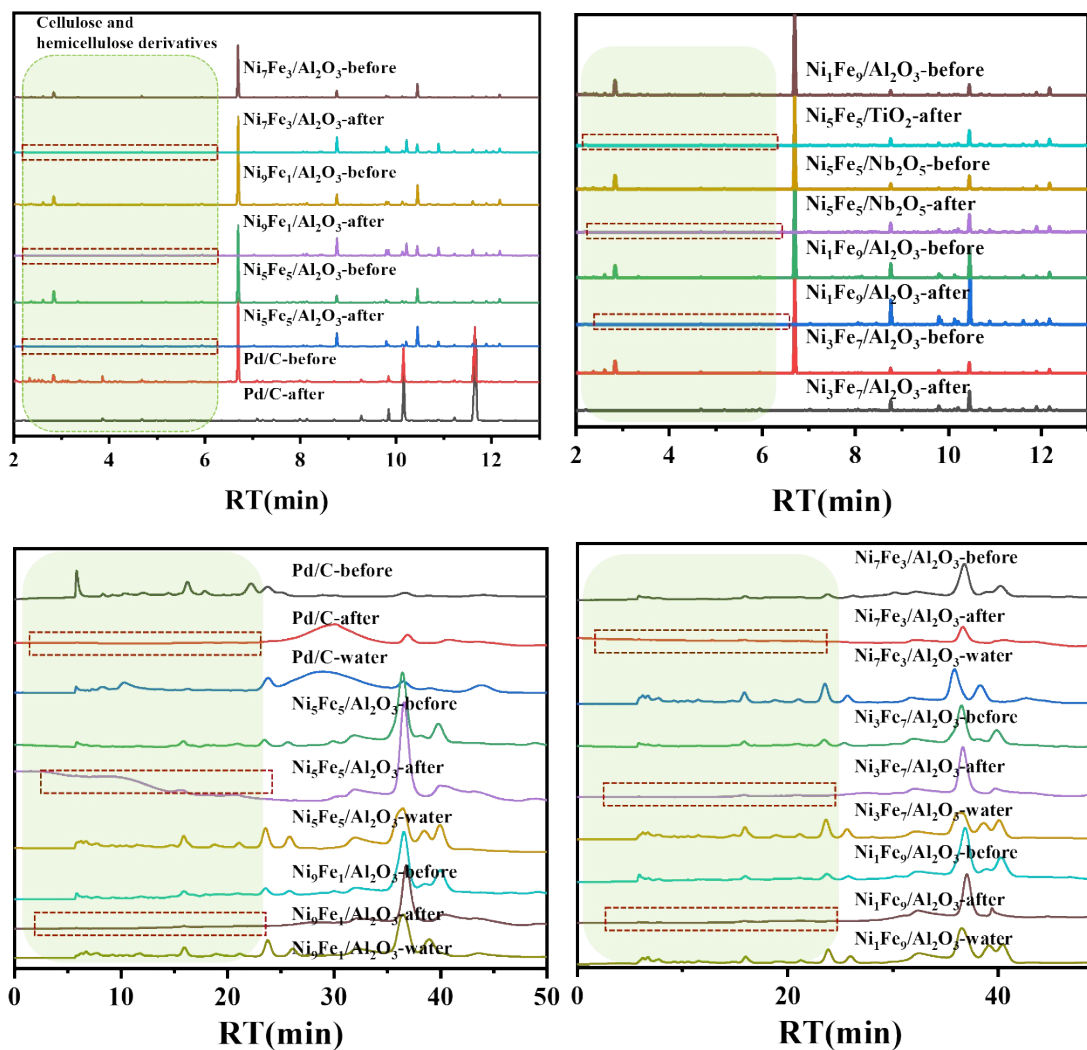

Figure S1 GC (a, b) and HPLC (c, d) chromatograms of the pre-extraction, post-extraction and aqueous phases.

Table S1. Catalysts composition and notation information.

| Catalysts                                                       | Support                        | Theoretical Ni:Fe<br>(wt/wt) | Experimental<br>Ni:Fe<br>(wt/wt) |
|-----------------------------------------------------------------|--------------------------------|------------------------------|----------------------------------|
| Ni <sub>5</sub> Fe <sub>5</sub> /Nb <sub>2</sub> O <sub>5</sub> | Nb <sub>2</sub> O <sub>5</sub> | 5:5                          | 3.66:3.03                        |
| Ni <sub>5</sub> Fe <sub>5</sub> /TiO <sub>2</sub>               | TiO <sub>2</sub>               | 5:5                          | 3.89:3.16                        |
| Ni <sub>5</sub> Fe <sub>5</sub> /ZrO <sub>2</sub>               | ZrO <sub>2</sub>               | 5:5                          | 3.26:2.70                        |
| Ni <sub>10</sub> /Al <sub>2</sub> O <sub>3</sub>                | Al <sub>2</sub> O <sub>3</sub> | 10:0                         | 7.02:0                           |
| Ni <sub>9</sub> Fe <sub>1</sub> /Al <sub>2</sub> O <sub>3</sub> | Al <sub>2</sub> O <sub>3</sub> | 9:1                          | 5.91:0.65                        |
| Ni <sub>7</sub> Fe <sub>3</sub> /Al <sub>2</sub> O <sub>3</sub> | Al <sub>2</sub> O <sub>3</sub> | 7:3                          | 5.06:2.28                        |
| Ni <sub>5</sub> Fe <sub>5</sub> /Al <sub>2</sub> O <sub>3</sub> | Al <sub>2</sub> O <sub>3</sub> | 5:5                          | 3.65:4.05                        |
| Ni <sub>3</sub> Fe <sub>7</sub> /Al <sub>2</sub> O <sub>3</sub> | Al <sub>2</sub> O <sub>3</sub> | 3:7                          | 2.07:4.49                        |
| Ni <sub>1</sub> Fe <sub>9</sub> /Al <sub>2</sub> O <sub>3</sub> | Al <sub>2</sub> O <sub>3</sub> | 1:9                          | 0.68:6.52                        |
| Fe <sub>10</sub> /Al <sub>2</sub> O <sub>3</sub>                | Al <sub>2</sub> O <sub>3</sub> | 0:10                         | 0:6.72                           |

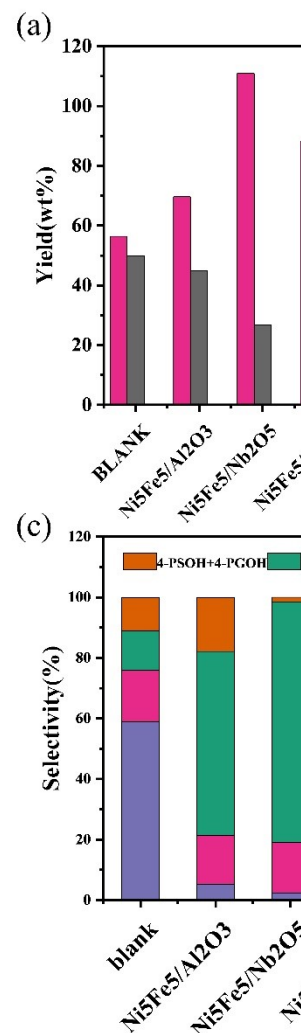

Figure S2. (a) Lignin oil yield and solid residue of different catalysts; (b) Monomers yield of different catalysts; (c) Selectivity of different catalysts; (d) Lignin oil yield and solid residue of different catalysts.

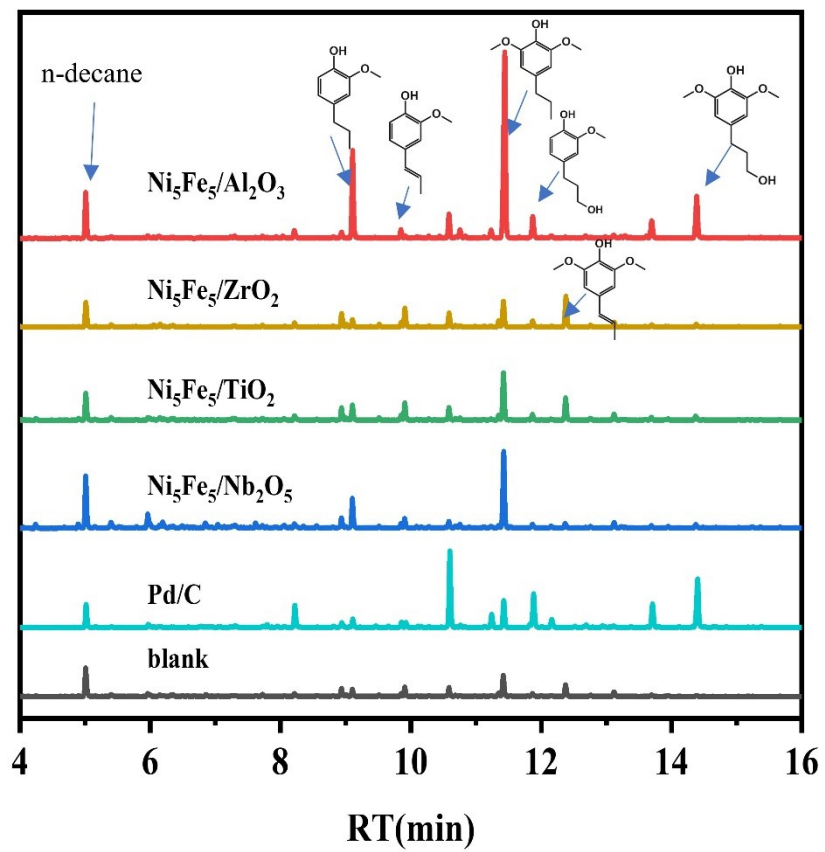

Figure S3 GC spectra of the lignin-derived monomers

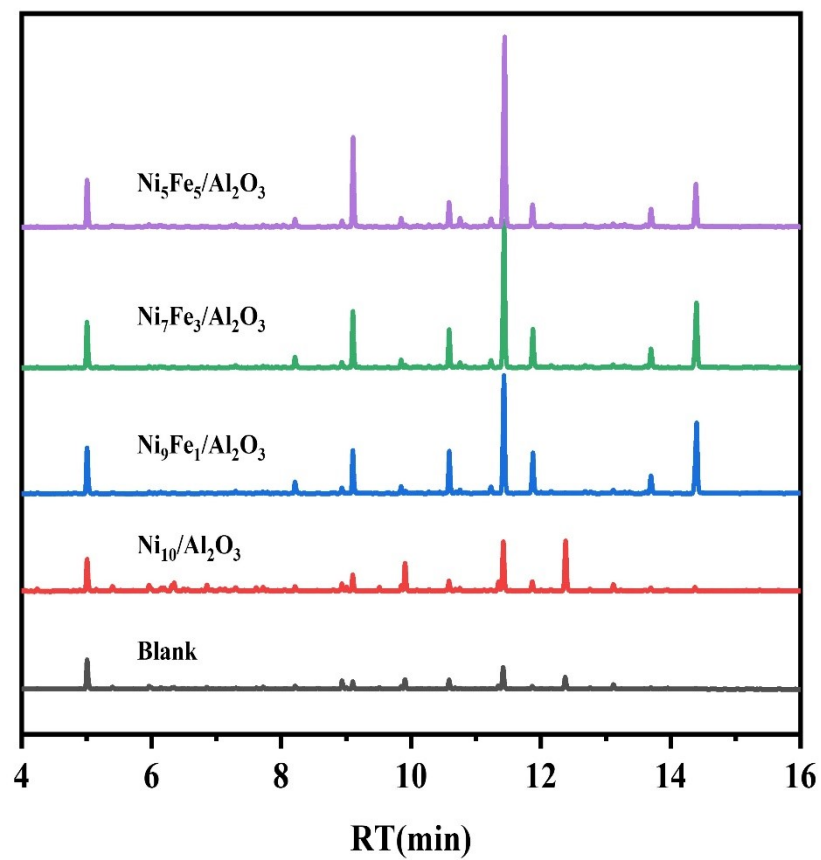

Figure S4. GC spectra of the lignin-derived monomers

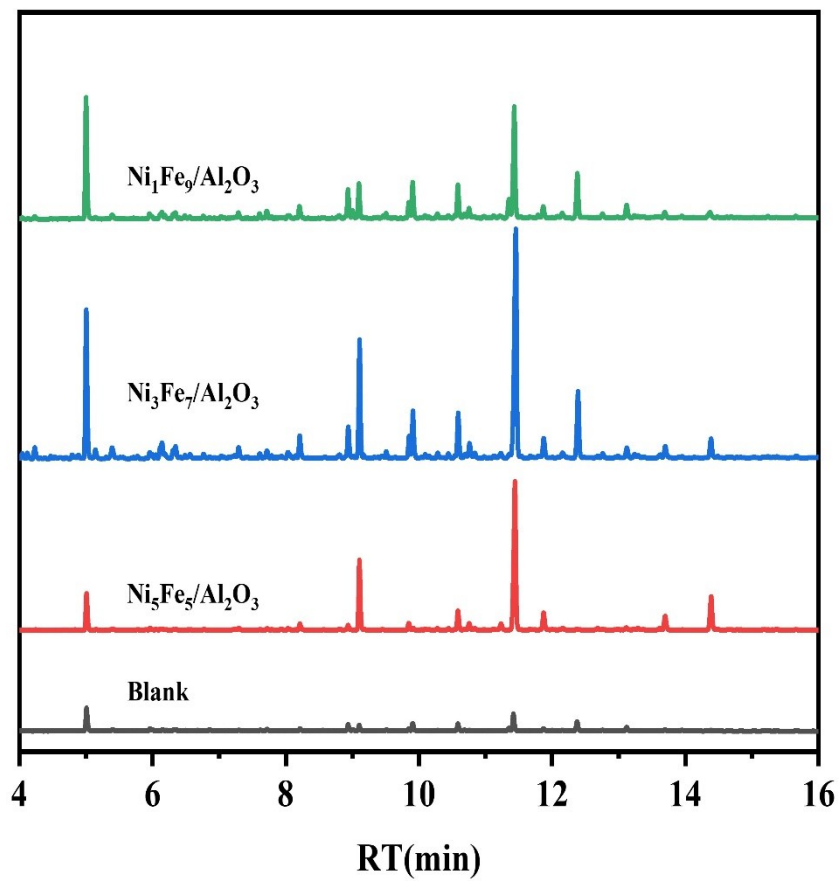

Figure S5. GC spectra of the lignin-derived monomers



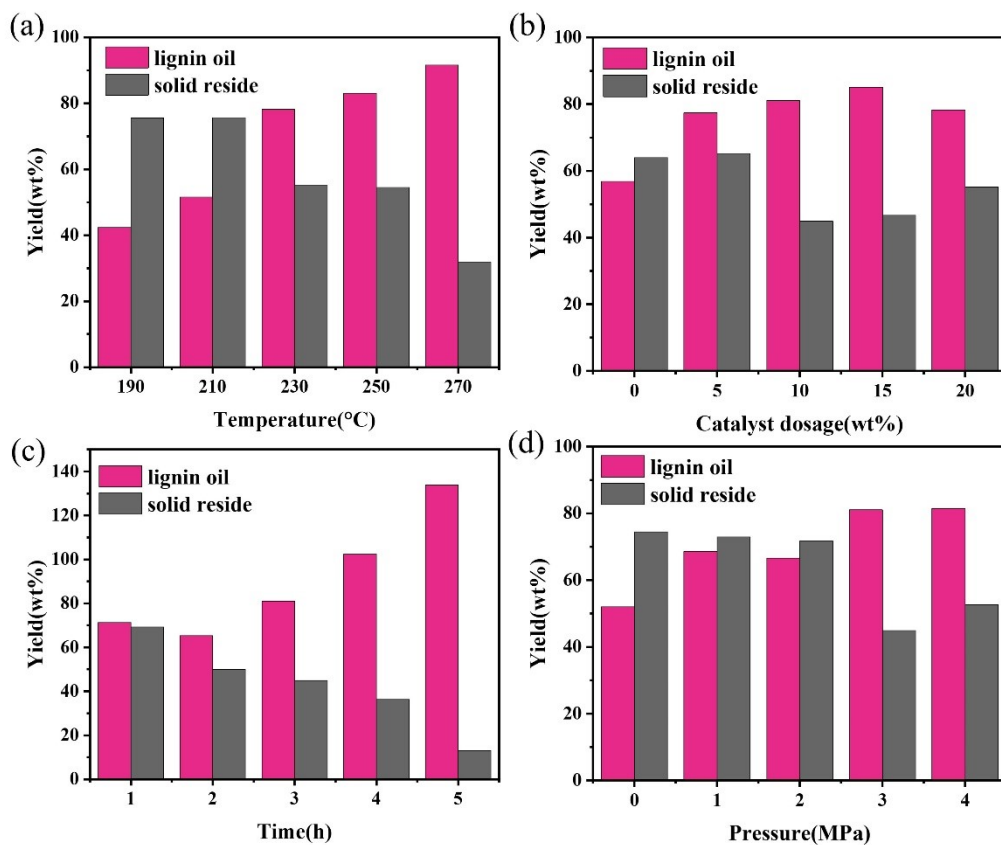

Figure S6. Influences of reaction parameters on lignin oil yield and solid residue. (a) Temperature; (b) Catalyst dosage; (c) Time; (d) Pressure.

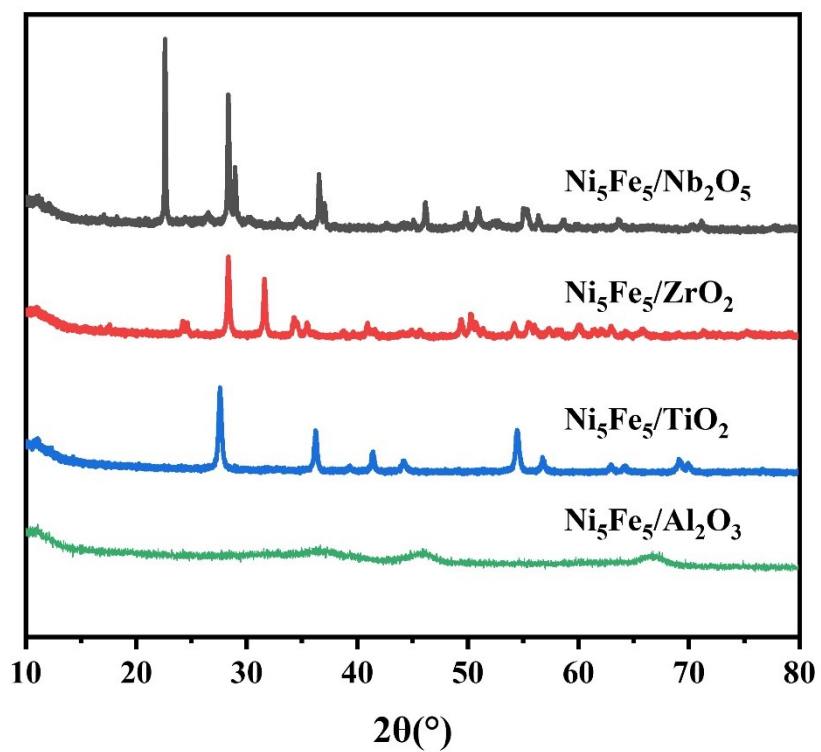

Figure S7. (a) XRD of different catalysts.

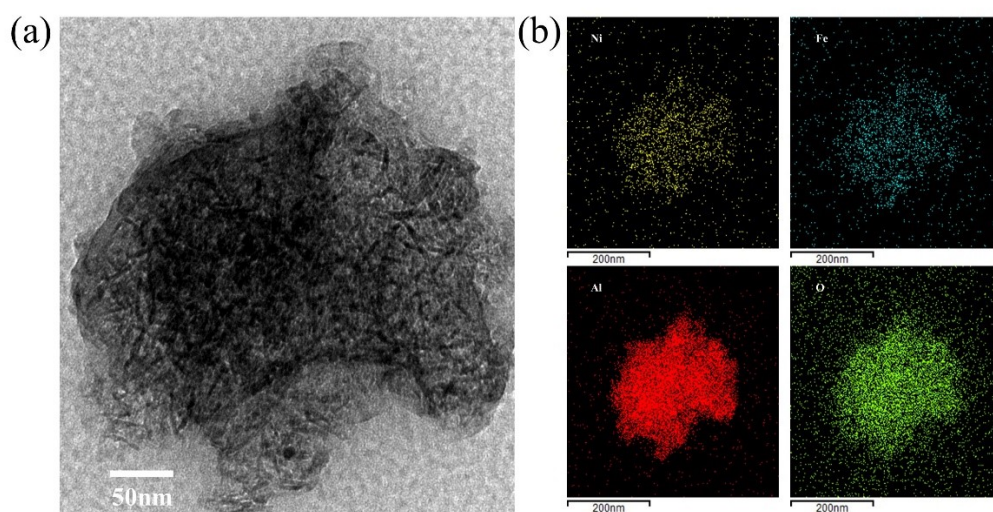

Figure S8 (a) TEM of  $\text{Ni}_5\text{Fe}_5/\text{Al}_2\text{O}_3$  catalyst; (b) EDS of  $\text{Ni}_5\text{Fe}_5/\text{Al}_2\text{O}_3$  catalyst.

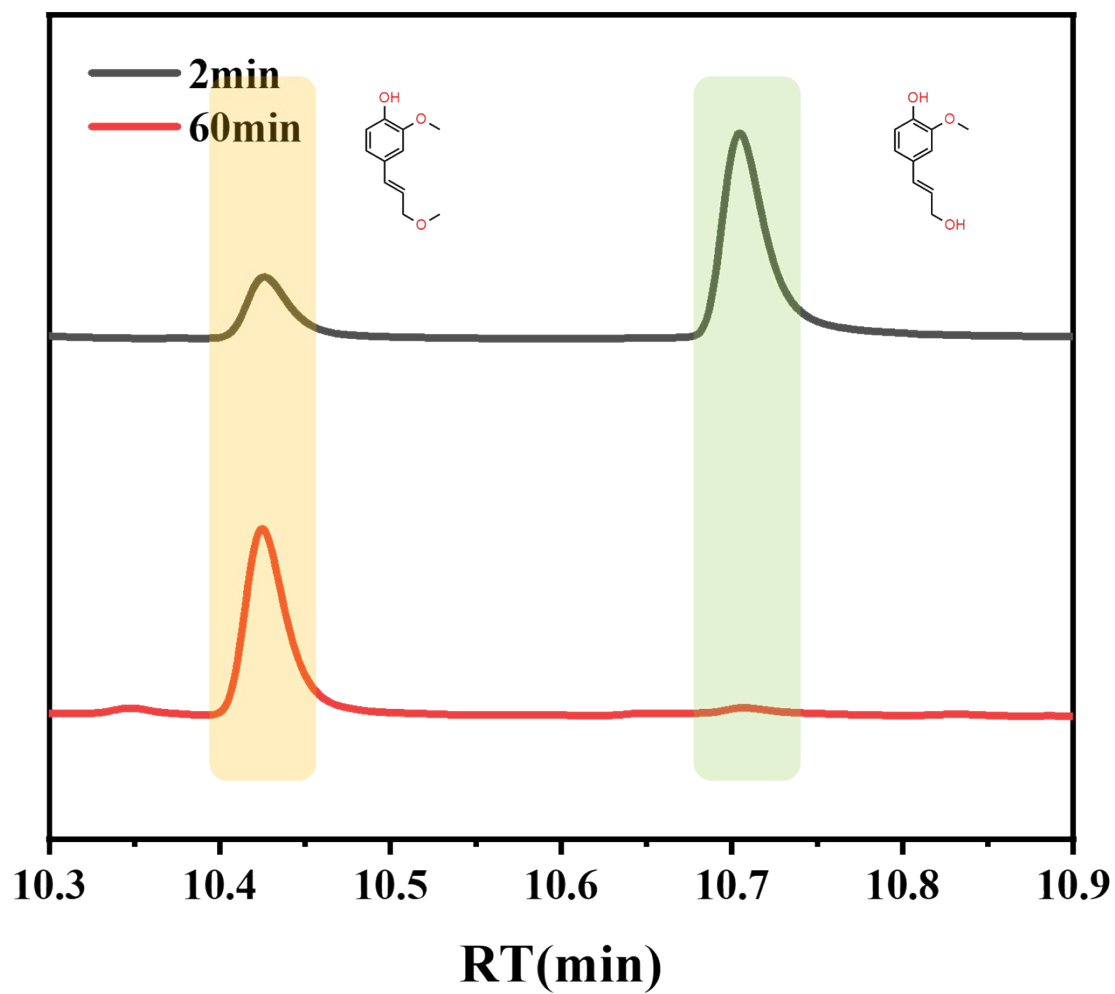

Figure S9. Gas chromatograms

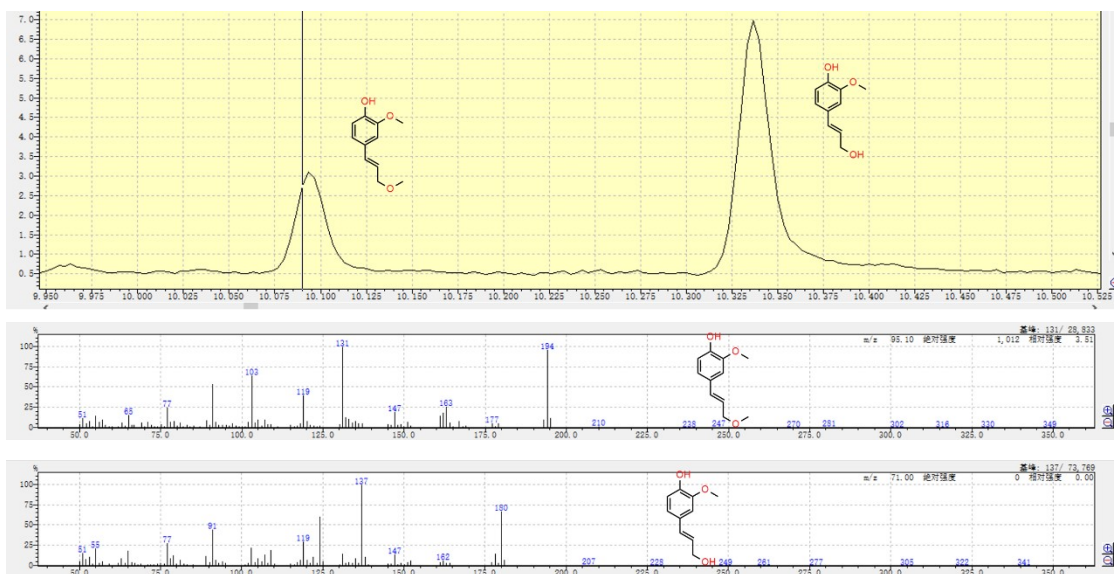

Figure S10 Mass spectrometry of intermediate 1D and 2A.

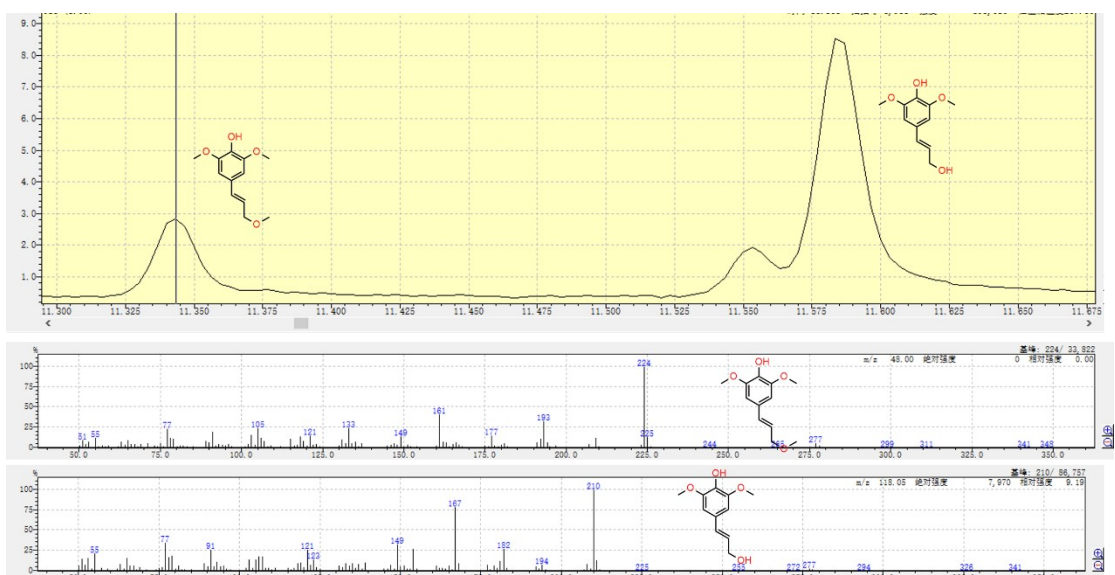

Figure S11 Mass spectrometry of intermediate 3D and 3E.

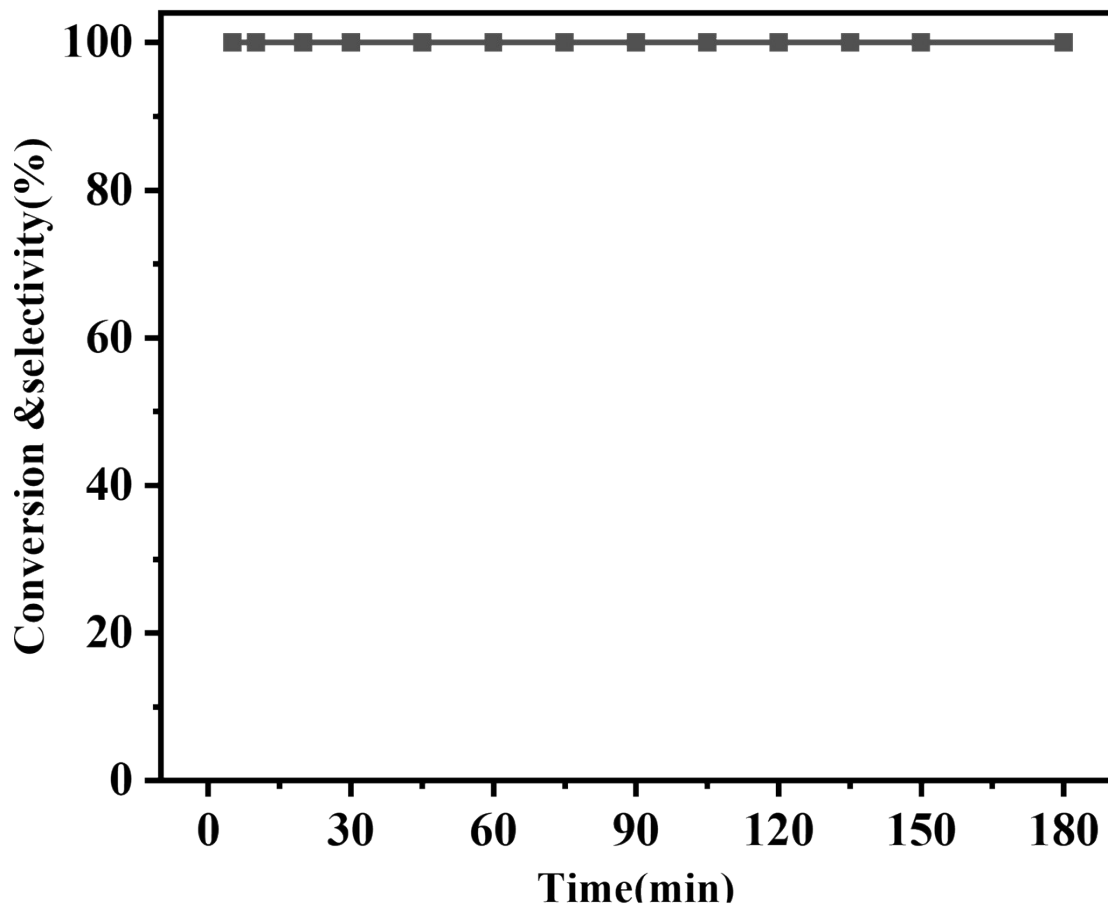

Figure S12 The conversion curves for bisphenol F.
